# Supplementary material
Source: Springer Nature journal article supplement (https://www.springermedizin.de/resource/supplementary/13229_2009_9_MOESM5_ESM.pdf/9676008)

**A** *HOXB1* c.82ins9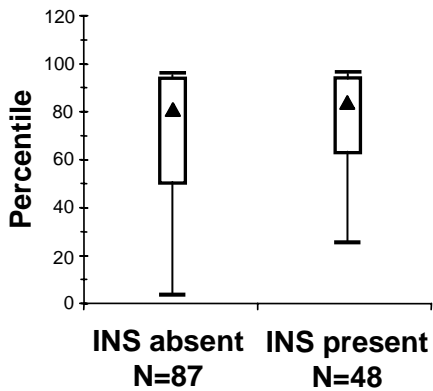**B** *HOXB1* c.309A>T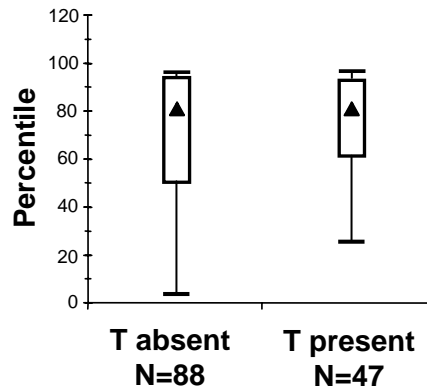**C** *HOXB1* c.82ins9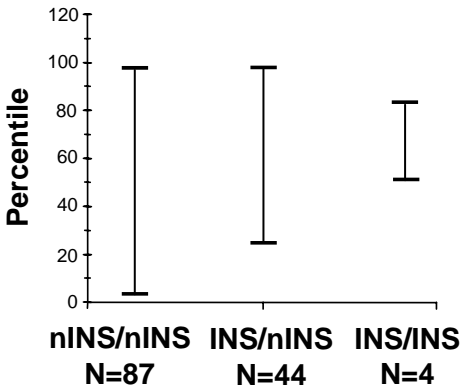**D** *HOXB1* c.309A>T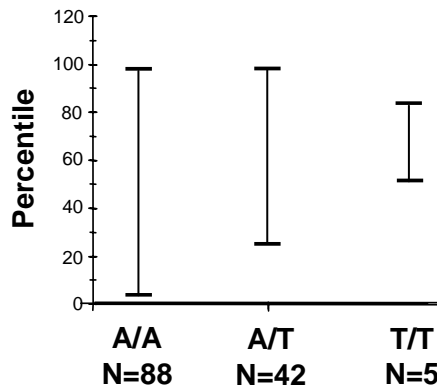**E** *HOXA1* c.218A>G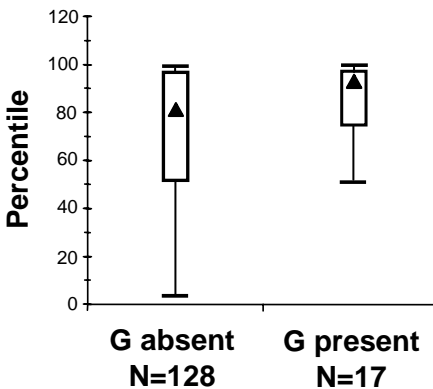**F** *HOXA1* x *HOXB1*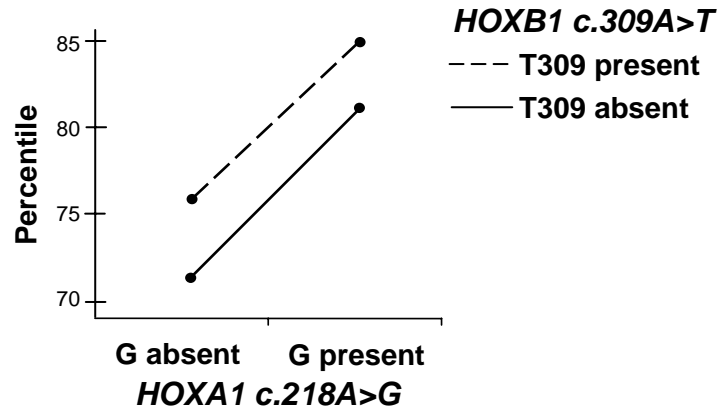

Supplement: MOESM5 [file 9676008]
